# Supplementary material for: Binary halide, ternary perovskite-like, and perovskite-derivative nanostructures: hot injection synthesis and optical and photocatalytic properties
Source: Royal Society of Chemistry journal article supplement (doi:10.1039/c6nr06740a), 2017-01-01
Supplement: c6nr06740a1.pdf [file c6nr06740a1.pdf]

## Supporting Information

### **Binary halides, ternary perovskite-like, and perovskite-derivative nanostructures: general hot injection synthesis, optical and photocatalytic properties**

*Suh-Ciuan Lim,<sup>‡a</sup> Hsuan-Peng Lin,<sup>‡a</sup> Wei-Lun Tsai<sup>b</sup>, Hao-Wu Lin<sup>b</sup>, Yao-Tsung Hsu<sup>a</sup> and Hsing-Yu Tuan<sup>\*a</sup>*

<sup>a</sup>Department of Chemical Engineering, National Tsing Hua University, 101, Section 2, Kuang-Fu Road, Hsinchu, Taiwan 30013, ROC.

<sup>b</sup>Department of Materials Science and Engineering, National Tsing Hua University, 101, Section 2, Kuang-Fu Road, Hsinchu, Taiwan 30013, ROC.

\* Corresponding author E-mail: [hytuan@che.nthu.edu.tw](mailto:hytuan@che.nthu.edu.tw)

#### **Experimental section**

##### **Chemicals**

All the chemicals were used as received. Potassium carbonate ( $K_2CO_3$ , 99.995%), Rubidium carbonate ( $Rb_2CO_3$ , 99.8%), Cesium Carbonate ( $Cs_2CO_3$ , 99.995%), Rubidium iodide ( $RbI$ , 99.9%), Lead (II) chloride ( $PbCl_2$ , 99.999%), Tin(II) chloride ( $SnCl_2$ , 99.99%), Tin (II) bromide ( $SnBr_2$ , 99.99%), Tin (II) iodide ( $SnI_2$ , 99.999%), Octadecene (ODE, 90% Aldrich), Oleic acid (OA,  $\geq 99\%$ ), Oleylamine (OLA, 70%), Trioctylphosphine (TOP, 97%), N-Methyl-2-pyrrolidone (NMP, anhydrous 99.5%) were purchased from Aldrich.

##### **Synthesis**

###### **(1) Halide nanoparticles**

###### **Preparation of alkali metal oleate solution:**

Alkali metal (K, Rb, Cs) oleate solution were prepared. 0.1 mole  $K_2CO_3$ ,  $Rb_2CO_3$ ,  $Cs_2CO_3$ ,  $RbI$  were loaded into 3-neck flask with 15 mL ODE or NMP ( $RbCl$  for NMP) and 1.2 mL OA, degassed under vacuum at 120 °C for 1h, the solution was then heated to 150-180 °C under Ar ( $KCl$ ,  $KBr$ ,  $RbBr$ ,  $RbI$  at 180°C) until all the alkali metal precursors reacted with OA.

###### **Synthesis of AX nanoparticles (A= K, Rb, Cs, X=Cl, Br, I):**

5 mL ODE and 0.2 mole  $PbCl_2$  or  $SnX_2$  (X = Cl, Br, I) were loaded into 3-neck flask with 1-2.5 mL OLA or TOP (1 mL OLA for  $KCl$ ,  $KBr$ ,  $RbBr$  or  $RbI$  and 2 mL OLA for  $CsBr$ ,  $CsI$  or  $RbCl$ , 2.5 mL TOP for  $CsCl$ ) degassed under vacuum at 120 °C for 1 h, and then 2 mL OA

were injected and heated to 150-200 °C under Ar, the solution was kept at certain temperature for 1 h (CsBr, CsI or RbCl for 150 °C and KCl, KBr, RbBr or RbI for 180 °C, CsCl for 200 °C). After complete dissolved of the  $PbX_2$  or  $SnX_2$ , 0.6 mL alkali metal oleate solution was then quickly injected and heat up to 180-240 °C (RbCl at 180 °C, CsBr at 200 °C, KCl, KBr, CsI, RbBr or RbI at 240 °C) for 30 min to 2 h under Ar (CsCl for 2 h).

## **(2) Perovskite-like nanoparticles**

### **Preparation of alkali metal oleate solution:**

Alkali metal (K, Rb) oleate solution was prepared. 0.1 mole  $Rb_2CO_3$ ,  $K_2CO_3$  were loaded into 3-neck flask with 15 mL ODE and 1.2 mL OA and degassed under vacuum at 120 °C for 1 h, the solution was then heated to 180 °C under Ar until all the alkali metal precursors reacted with OA.

### **Synthesis of $APb_2Cl_5$ nanoparticles (A = K, Rb):**

5 mL ODE and 0.2 mole  $PbCl_2$  were loaded into 3-neck flask with 1-2 mL OLA (1mL OLA for  $KPb_2Cl_5$ , 2 mL OLA for  $RbPb_2Cl_5$ ) degassed under vacuum at 120 °C for 1 h, and 2 mL OA was injected. The temperature was then raised to 180 °C under Ar for 1 hr. After complete dissolved of the  $PbCl_2$ , 0.6 mL alkali metal oleate solution was then quickly injected and heat up to 220-240 °C ( $RbPb_2Cl_5$  at 220 °C,  $KPb_2Cl_5$  at 240 °C) for 30-40 min ( $KPb_2Cl_5$  for 30 min,  $RbPb_2Cl_5$  for 40 min).

## **(3) Perovskite derivative nanoparticles**

### **Preparation of alkali metal oleate solution:**

Alkali metal (Rb, Cs) oleate solution was prepared. 0.1 mole  $Rb_2CO_3$ ,  $Cs_2CO_3$  were loaded into 3-neck flask with 15 mL ODE and 1.2 mL OA and degassed under vacuum at 120 °C for 1 h, the solution was then heated to 150-180 °C ( $Cs_2CO_3$  at 150 °C,  $Rb_2CO_3$  at 180 °C) under Ar until all the alkali metal precursors reacted with OA.

### **Synthesis of $A_2SnCl_6$ nanoparticles (A = Rb, Cs):**

5 mL ODE and 0.2 mole  $SnCl_2$  were loaded into 3-neck flask with 1-2 mL OLA (1 mL OLA for  $Rb_2SnCl_6$ ; 2 mL for  $Cs_2SnCl_6$ ) degassed under vacuum at 120 °C for 1 h, and 2 mL OA was injected. The temperature was then raised to 180-200 °C ( $Rb_2SnCl_6$  at 180 °C;  $Cs_2SnCl_6$  at 200 °C) under Ar for 1 h. After complete dissolved of the  $SnCl_2$ , 0.6 mL alkali metal oleate solution was then quickly injected and heat up to 220-240 °C ( $Cs_2SnCl_6$  at 200 °C,  $Rb_2SnCl_6$  for 240 °C) for 30-40 min ( $Cs_2SnCl_6$  for 30 min,  $Rb_2SnCl_6$  for 40 min).

## **Photocatalytic testing**

The photocatalytic activities of perovskite-likes and perovskite-derivatives nanoparticles were tested by degrading an organic dye, Rh6G in THF solution. In the photocatalytic experiments, 30 mg of as-synthesized nanomaterials was added to a beaker containing 100 mL of Rh6G THF solution with

concentration of 2 mg/L, and the solution was stirred in the dark for 1 h to reach adsorption–desorption equilibrium between the catalyst and Rh6G. The mixture was then irradiated using a 20 W 360 nm UVA lamp. The reaction mixture was irradiated for a certain period; about 3 mL of the suspension was taken out and immediately centrifuged for UV-Vis measurement.

### Characterization and Measurement

The phase structure of the as-synthesized products were examined by X-ray diffraction (XRD, Rigaku Ultima IV X-ray diffractometer, Cu  $K\alpha$   $\lambda = 1.54178 \text{ \AA}$ ,  $1^\circ/\text{min}$ ). The microstructure was observed using the field emission scanning electron microscope (SEM, Hitachi SU8010) and transmission electron microscope (TEM, JEOL JEM-ARM200FTH and Philips TECHAI20). UV-Vis spectra were obtained using Hitachi U-4100 UV-Vis spectrophotometer. Photoluminescence (PL) spectra were obtained using Horiba Scientific FluoroMax-4 spectrofluorometer. All optical measurements were obtained by nanomaterials dispersed in THF which were contained in quartz cuvette with 1 cm path length.

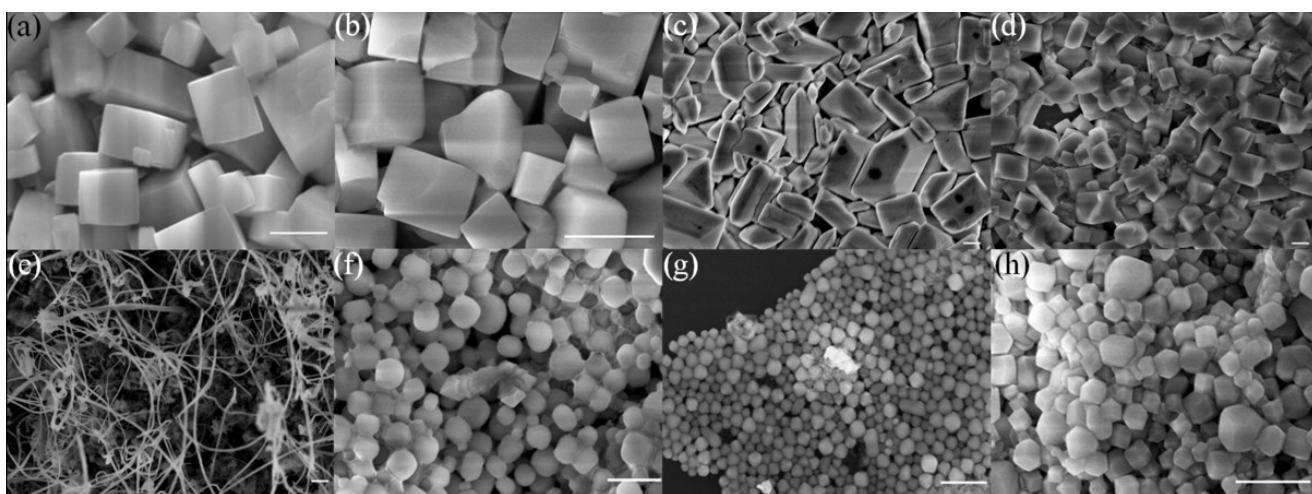

Fig S1: Representative low-resolution SEM image of as-grown halides, (a) KCl (b) KBr (c) RbCl (d) RbBr (e) RbI (f) CsCl (g) CsBr (h) CsI. Scale bar. 1  $\mu\text{m}$

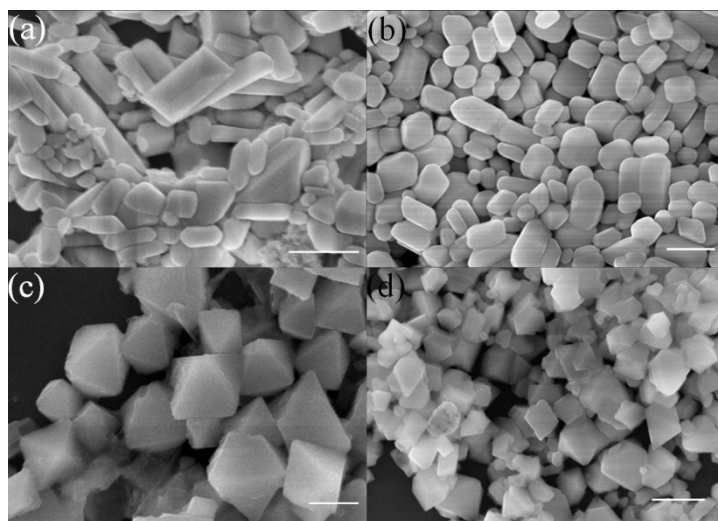

Fig S2: Representative low-resolution SEM image of as-grown perovskite-likes and perovskite-derivatives, (a)  $\text{KPb}_2\text{Cl}_5$  (b)  $\text{RbPb}_2\text{Cl}_5$  (c)  $\text{Rb}_2\text{SnCl}_6$  (d)  $\text{Cs}_2\text{SnCl}_6$ . Scale bar, 500 nm

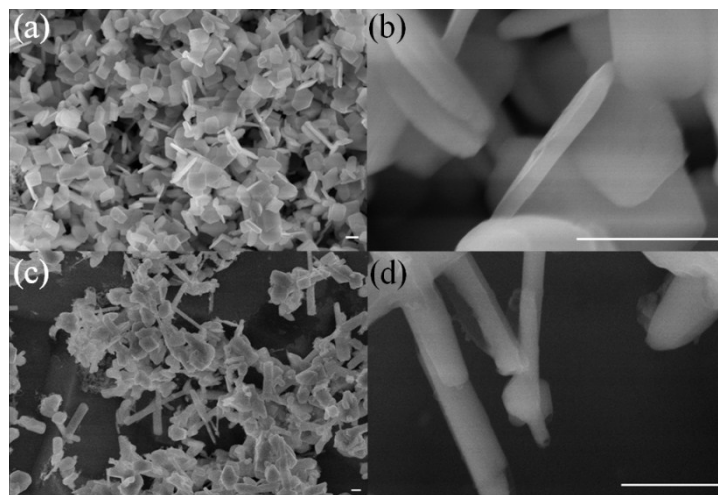

Fig S3: Representative SEM image of perovskite-derivatives  $\text{Rb}_2\text{SnCl}_6$ . (a), (b) plates; (c), (d) whiskers. Scale bar, 500 nm

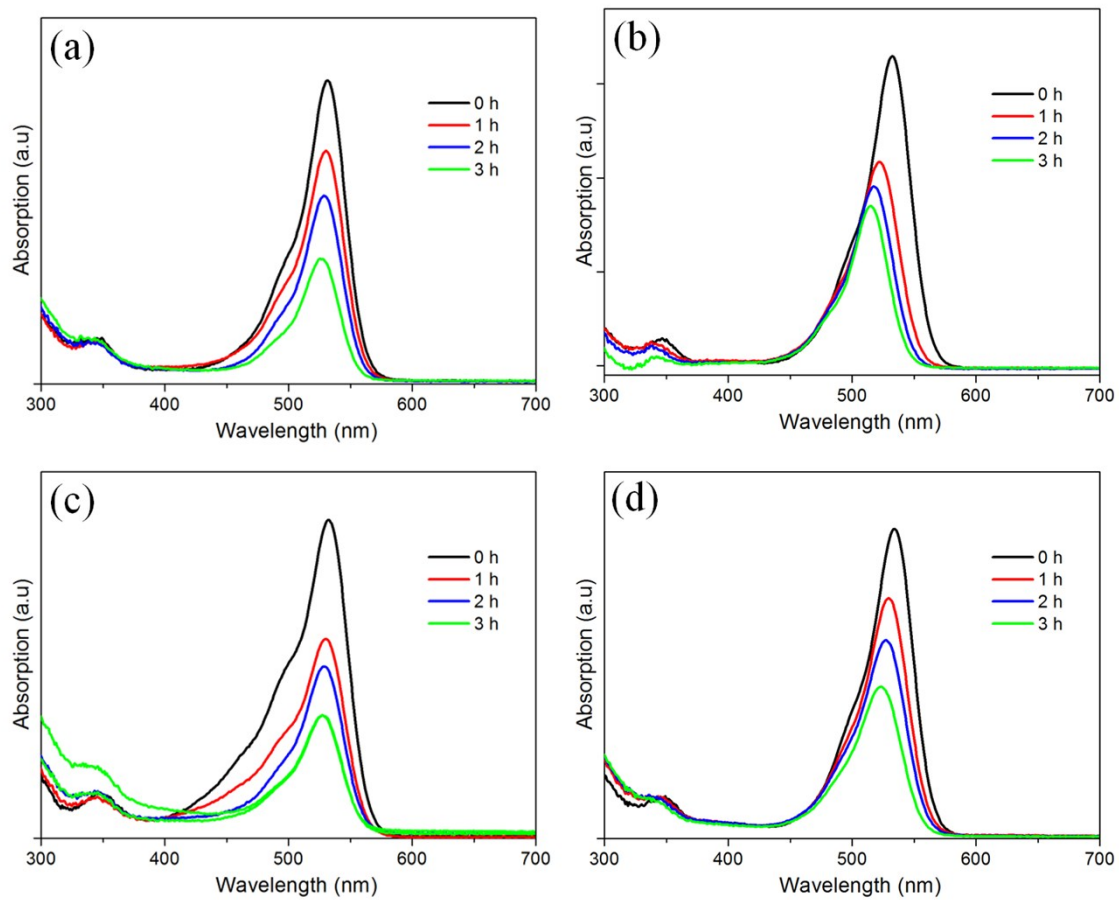

**Fig S4 Time-dependent UV-vis spectra recorded during the photocatalytic degradation of Rhodamine 6G by using (a)  $\text{K}\text{Pb}_2\text{Cl}_5$ , (b)  $\text{Rb}_2\text{SnCl}_6$ , (c)  $\text{Rb}_2\text{PbCl}_5$ , (d)  $\text{Cs}_2\text{SnCl}_6$**

**Table S1: Synthetic conditions and results for various halides, perovskite-likes and perovskite derivatives**

| Compound                          | Precursor                                            | ODE/NMP (mL) | OLA/TOP (mL) | Reaction Temperature (°C) | Reaction Time (min) | Morphology, size                      |
|-----------------------------------|------------------------------------------------------|--------------|--------------|---------------------------|---------------------|---------------------------------------|
| KCl                               | K <sub>2</sub> CO <sub>3</sub><br>SnCl <sub>2</sub>  | 15 ml ODE    | 1 ml OLA     | 240                       | 30                  | Cuboid, 300 nm-1 μm                   |
| KBr                               | K <sub>2</sub> CO <sub>3</sub><br>SnBr <sub>2</sub>  | 15 ml ODE    | 1 ml OLA     | 240                       | 30                  | Cuboid, 300 nm-1 μm                   |
| RbCl                              | RbI<br>PbCl <sub>2</sub>                             | 15 ml NMP    | 2 ml OLA     | 180                       | 30                  | Cuboid or irregular shape, 500 nm-2μm |
| RbBr                              | Rb <sub>2</sub> CO <sub>3</sub><br>SnBr <sub>2</sub> | 15 ml ODE    | 1 ml OLA     | 240                       | 30                  | Cuboid, 500 nm-2μm                    |
| RbI                               | Rb <sub>2</sub> CO <sub>3</sub><br>SnI <sub>2</sub>  | 15 ml ODE    | 1 ml OLA     | 240                       | 30                  | Wire-like, 30-50 nm in diameter       |
| CsCl                              | Cs <sub>2</sub> CO <sub>3</sub><br>SnCl <sub>2</sub> | 15 ml ODE    | 2.5 ml TOP   | 200                       | 120                 | Sphere, 300-500 nm                    |
| CsBr                              | Cs <sub>2</sub> CO <sub>3</sub><br>SnBr <sub>2</sub> | 15 ml ODE    | 2 ml OLA     | 200                       | 30                  | Yarn ball, 100-300 nm                 |
| CsI                               | Cs <sub>2</sub> CO <sub>3</sub><br>SnI <sub>2</sub>  | 15 ml ODE    | 2 ml OLA     | 240                       | 30                  | Cube, 100-300 nm                      |
| KPb <sub>2</sub> Cl <sub>5</sub>  | K <sub>2</sub> CO <sub>3</sub><br>PbCl <sub>2</sub>  | 15 ml ODE    | 1 ml OLA     | 240                       | 30                  | Short rod or cuboid, 200- 500 nm      |
| RbPb <sub>2</sub> Cl <sub>5</sub> | Rb <sub>2</sub> CO <sub>3</sub><br>PbCl <sub>2</sub> | 15 ml ODE    | 2 ml OLA     | 220                       | 40                  | Short rod or cuboid, 200- 500 nm      |
| Rb <sub>2</sub> SnCl <sub>6</sub> | Rb <sub>2</sub> CO <sub>3</sub><br>SnCl <sub>2</sub> | 15 ml ODE    | 1 ml OLA     | 200                       | 40                  | Octahedral 300- 500 nm                |
| Cs <sub>2</sub> SnCl <sub>6</sub> | Cs <sub>2</sub> CO <sub>3</sub><br>SnCl <sub>2</sub> | 15 ml ODE    | 2 ml OLA     | 200                       | 30                  | Octahedral 300- 500 nm                |
| Cs <sub>2</sub> SnCl <sub>6</sub> | Cs <sub>2</sub> CO <sub>3</sub><br>SnCl <sub>2</sub> | 15 ml ODE    | 2 ml TOP     | 180                       | 30                  | Plates 300- 500 nm                    |
| Cs <sub>2</sub> SnCl <sub>6</sub> | Cs <sub>2</sub> CO <sub>3</sub><br>SnCl <sub>2</sub> | 15 ml ODE    | 2 ml TOP     | 200                       | 30                  | Whiskers, 50-100 nm in diameter       |
